# Supplementary material for: Long-Term Cognitive Outcomes and Associated Quality of Life of Young Adults Who Experienced Liver Transplantation in Early Childhood
Source: Frontiers journal article supplement (doi:10.3389/frtra.2022.919232), 2022-07-07
Supplement: Table_1.pdf [file Table_1.pdf]

**Supplementary Table 1 Details about tests administered to the audit groups**

| Test                                            | What it measures and in which participant group                                                                                                                                                                                                                                                                                                                                                                                                                                            | How long the test takes to administer / other factors affecting utility                                                                                                                                                                                                                                                                                                                                                                                                                                                                                                                                                                                                                                                                                                                                                                                                                                                                                                    |
|-------------------------------------------------|--------------------------------------------------------------------------------------------------------------------------------------------------------------------------------------------------------------------------------------------------------------------------------------------------------------------------------------------------------------------------------------------------------------------------------------------------------------------------------------------|----------------------------------------------------------------------------------------------------------------------------------------------------------------------------------------------------------------------------------------------------------------------------------------------------------------------------------------------------------------------------------------------------------------------------------------------------------------------------------------------------------------------------------------------------------------------------------------------------------------------------------------------------------------------------------------------------------------------------------------------------------------------------------------------------------------------------------------------------------------------------------------------------------------------------------------------------------------------------|
| Bayley scales of infant and toddler development | Standard test of development for infants and toddlers aged 1-42 months; enables identification of strengths and competencies as well as weaknesses;                                                                                                                                                                                                                                                                                                                                        | Requires face to face test conditions, and qualified psychologist to administer (training required). Takes 45-60 minutes. License to use required; kit available to purchase from Pearson                                                                                                                                                                                                                                                                                                                                                                                                                                                                                                                                                                                                                                                                                                                                                                                  |
| Wechsler scales                                 | Widely used measure of intelligence with age-appropriate versions from preschool through to adult; the Wechsler Abbreviated Scale of Intelligence (WASI) is a short form estimate of intellectual functioning suitable for children from the age of 6 years through to adults of 90 years; the WASI comprises two or four subtests                                                                                                                                                         | Administered by registered user face to face; WASI 4 subtest version (30 minutes to administer) comprises vocabulary, block design, similarities and matrix reasoning and a full scale IQ (FSIQ) is computed. license to use required and can be purchased from Pearson                                                                                                                                                                                                                                                                                                                                                                                                                                                                                                                                                                                                                                                                                                    |
| Beck Youth Inventory (BYI)                      | Five inventories to evaluate emotional and social functioning in children and young people aged 7-18 years; inventories each contain 20 statements about thoughts, feelings and behaviours and the respondent rates how frequently each statement has been true for them; inventories cover depression, anxiety, anger, self-concept and disruptive behavior; anxiety and depression inventories used in the current audit; scores are classified as severe, moderate, mild or no problems | Takes 5-10 minutes to complete each inventory; available to purchase from Pearson                                                                                                                                                                                                                                                                                                                                                                                                                                                                                                                                                                                                                                                                                                                                                                                                                                                                                          |
| Hospital Anxiety and Depression Scale (HADS)    | A 14 item measure of anxiety and depression (7 items each) developed for people with physical health problems; each item is scored from 0-3, with a maximum score of 21 for each the two subscales; scores are classified as severe, moderate, mild or no problems                                                                                                                                                                                                                         | Completion takes 5-10 minutes; available to purchase from GL Assessment                                                                                                                                                                                                                                                                                                                                                                                                                                                                                                                                                                                                                                                                                                                                                                                                                                                                                                    |
| Fatigue severity scale (FSS)                    | A 9 item scale measuring the severity of fatigue and the impact of it on activities and lifestyle. Responses are on a 7 point scale indicating level of agreement; can be used with children and young people of 8 years and older                                                                                                                                                                                                                                                         | Takes 5 minutes<br>No training required; can be done by post or over the telephone. Free to use.                                                                                                                                                                                                                                                                                                                                                                                                                                                                                                                                                                                                                                                                                                                                                                                                                                                                           |
| EQ-5D                                           | A generic standardized measure comprising one question in each of 5 domains (mobility, self-care, usual activities, pain/discomfort and anxiety/depression) assessed on a 5 point scale and a visual analogue scale for respondents to evaluate overall health status; can be used in young people 16 years old & above                                                                                                                                                                    | Takes 5 minutes<br>No training required; can be done via post or over the telephone. Free to use in audit of less than 100 participants                                                                                                                                                                                                                                                                                                                                                                                                                                                                                                                                                                                                                                                                                                                                                                                                                                    |
| PeLTQL <sup>®</sup>                             | Disease-specific questionnaire for children and young people aged 8-17 years who have undergone LT at least 12 months previously; 26 items in 3 domains: Future health (9 questions); coping and adjustment (8 questions) Social-Emotional (9 questions); 5-point Likert scale used and responses reverse scored and scaled to provide possible final scores with a range of 0-100, with higher scores indicating better HRQoL                                                             | Takes 5-10 minutes to complete; easy to administer and complete; some training required for scoring and administration. Copyright protected – permissions need to be obtained from PeLTQL.info@sickkids.ca<br>Minimal revisions were made to the wording of 3 questions to make the measure appropriate for young people over the age of 17 years, as follows: <i>Question 5 - “How do you feel about changing to a health care team that takes care of adults when you get older?” was changed to “How did you feel about changing to a health care team that takes care of adults?”; Question 10 - “Do you feel that your parents are too protective?” was changed to “Do you feel your family are too protective?”; Question 18 - “Do you worry that you miss more school than other students who have not had a liver transplant” was changed to “Do you worry that you have missed more school or college than other people who have not had a liver transplant?”</i> |
